# Supplementary material for: Temporal variation of cesium isotope concentrations and atom ratios in zooplankton in the Pacific off the east coast of Japan
Source: PubMed Central journal article supplement (PMC5209667; doi:10.1038/srep39874), 2017-01-04
Supplement: srep39874-s1.pdf [file srep39874-s1.pdf]

**Supplementary information for  
Temporal variation of cesium isotope concentrations and atom ratios  
in zooplankton in the Pacific off the east coast of Japan**

Takahito Ikenoue<sup>a,\*</sup>, Hyoe Takata<sup>a</sup>, Masashi Kusakabe<sup>a</sup>, Natsumi Kudo<sup>a</sup>, Kazuyuki Hasegawa<sup>a</sup>,  
Takashi Ishimaru<sup>b, c</sup>

<sup>a</sup> Central Laboratory, Marine Ecology Research Institute, 300 Iwawada, Onjuku-machi,  
Isumi-gun, Chiba 299-5105, Japan

<sup>b</sup> Marine Ecology Research Institute, Tohwa-Edogawabashi Bldg., 347 Yamabuki-cho,  
Shinjuku-ku, Tokyo 162-0801, Japan

<sup>c</sup> Department of Marine Science, Tokyo University of Marine Science and Technology, 5-7,  
Konan 4, Minato-ku, Tokyo 108-8477, Japan

\*Corresponding author: Takahito Ikenoue, E-mail: [ikenoue@kaiseiken.or.jp](mailto:ikenoue@kaiseiken.or.jp)

Table S1. Summaries of zooplankton samples, zooplankton abundance, and class-level abundance.

| Stn. <sup>a</sup> | Sampling date | Sampling layer | Sample weight | Flow water volume | Biomass                  | Water content | Zooplankton abundance        | Class-level abundance (individual/m <sup>3</sup> ) |              |             |              |             |           |                |             |        |
|-------------------|---------------|----------------|---------------|-------------------|--------------------------|---------------|------------------------------|----------------------------------------------------|--------------|-------------|--------------|-------------|-----------|----------------|-------------|--------|
|                   |               |                |               |                   |                          |               |                              | Hydrozoa                                           | Branchiopoda | Maxillopoda | Malacostraca | Sagittoidea | Thalassia | Appendicularia | Oseichthyes | Others |
|                   | (JST)         | (m)            | (g-wet)       | (m <sup>3</sup> ) | (mg-wet/m <sup>3</sup> ) | (%)           | (individual/m <sup>3</sup> ) |                                                    |              |             |              |             |           |                |             |        |
| Cruise: F12OS/1   |               |                |               |                   |                          |               |                              |                                                    |              |             |              |             |           |                |             |        |
| B3                | 29-May-2012   | 50             | 230           | 9578              | 24                       | 91            | 26.8                         | 1.9                                                | 0.1          | 11.4        | 11.0         | 1.1         | 0.0       | 0.1            | 1.1         | 0.1    |
| E1                | 25-May-2012   | 50             | 1335          | 19521             | 68                       | 91            | 122.1                        | 29.6                                               | 0.0          | 46.5        | 43.8         | 1.4         | 0.9       | 0.0            | 0.0         | 0.0    |
| E5                | 26-May-2012   | 75             | 1467          | 23207             | 63                       | 94            | 50.2                         | 7.4                                                | 0.2          | 25.5        | 10.7         | 2.1         | 1.9       | 1.3            | 0.0         | 1.1    |
| G0                | 20-May-2012   | 50             | 446           | 20617             | 22                       | 88            | 35.0                         | 1.9                                                | 0.1          | 23.8        | 7.6          | 0.9         | 0.3       | 0.4            | 0.0         | 0.0    |
| G4                | 21-May-2012   | 60             | 1244          | 22119             | 56                       | 91            | 81.4                         | 24.0                                               | 0.8          | 19.5        | 34.1         | 0.0         | 2.6       | 0.0            | 0.0         | 0.4    |
| J1                | 16-May-2012   | 20             | 106           | 12355             | 9                        | 93            | 4.6                          | 0.4                                                | 0.1          | 1.8         | 0.8          | 0.0         | 0.0       | 0.0            | 1.5         | 0.0    |
| J3                | 18-May-2012   | 50             | 772           | 19973             | 39                       | 94            | 53.3                         | 10.3                                               | 0.8          | 10.8        | 24.7         | 0.5         | 3.4       | 1.3            | 0.0         | 1.5    |
| Cruise: F12OS/2   |               |                |               |                   |                          |               |                              |                                                    |              |             |              |             |           |                |             |        |
| B3                | 02-Aug-2012   | 43             | 1769          | 25333             | 70                       | 90            | 65.9                         | 6.7                                                | 0.0          | 28.2        | 18.9         | 10.5        | 0.9       | 0.0            | 0.2         | 0.5    |
| E1                | 06-Aug-2012   | 60             | 1067          | 12901             | 83                       | 94            | 58.4                         | 19.3                                               | 0.6          | 28.1        | 6.9          | 0.8         | 1.7       | 0.3            | 0.6         | 0.3    |
| E5                | 04-Aug-2012   | 45-65          | 234           | 17042             | 14                       | 95            | 12.3                         | 2.7                                                | 0.5          | 6.8         | 0.7          | 1.2         | 0.0       | 0.2            | 0.1         | 0.1    |
| G0                | 08-Aug-2012   | 50             | 1506          | 22211             | 68                       | 94            | 37.3                         | 10.5                                               | 0.0          | 17.9        | 4.9          | 2.7         | 0.9       | 0.0            | 0.2         | 0.2    |
| G4                | 09-Aug-2012   | 50-70          | 1682          | 19130             | 88                       | 94            | 45.5                         | 0.6                                                | 3.3          | 27.0        | 3.9          | 3.1         | 2.7       | 1.8            | 0.4         | 2.7    |
| J1                | 13-Aug-2012   | 35             | 1119          | 10915             | 103                      | 94            | 113.4                        | 47.5                                               | 0.0          | 18.8        | 9.2          | 27.7        | 7.9       | 0.0            | 0.7         | 1.7    |
| J3                | 12-Aug-2012   | 70             | 706           | 17370             | 41                       | 94            | 31.0                         | 11.2                                               | 0.9          | 11.1        | 2.3          | 2.3         | 1.4       | 0.4            | 1.1         | 0.3    |
| Cruise: F12OS/3   |               |                |               |                   |                          |               |                              |                                                    |              |             |              |             |           |                |             |        |
| B3                | 31-Oct-2012   | 50             | 1560          | 20661             | 76                       | 92            | 47.8                         | 3.9                                                | 6.7          | 25.5        | 3.0          | 7.6         | 0.0       | 0.3            | 0.0         | 0.8    |
| E1                | 27-Oct-2012   | 50             | 1137          | 23417             | 49                       | 92            | 50.5                         | 5.3                                                | 3.2          | 28.6        | 4.9          | 6.0         | 0.2       | 0.8            | 0.6         | 0.8    |
| E5                | 26-Oct-2012   | 50             | 1759          | 22996             | 77                       | 93            | 28.9                         | 3.3                                                | 0.0          | 17.0        | 0.8          | 3.2         | 1.1       | 2.2            | 0.3         | 1.1    |
| G0                | 24-Oct-2012   | 50             | 892           | 26238             | 34                       | 91            | 20.9                         | 0.5                                                | 0.0          | 11.9        | 3.1          | 4.2         | 0.3       | 0.8            | 0.1         | 0.0    |
| G4                | 04-Nov-2012   | 50             | 1727          | 21967             | 79                       | 93            | 90.9                         | 6.3                                                | 0.0          | 55.2        | 4.5          | 19.6        | 1.0       | 2.1            | 0.0         | 2.1    |
| J1                | 07-Nov-2012   | 50             | 1637          | 18294             | 89                       | 89            | 161.6                        | 1.2                                                | 2.4          | 112.1       | 22.7         | 20.9        | 0.0       | 0.0            | 0.6         | 1.8    |
| Cruise: F12OS/4   |               |                |               |                   |                          |               |                              |                                                    |              |             |              |             |           |                |             |        |
| B3                | 16-Jan-2013   | 50             | 685           | 21913             | 31                       | 94            | 40.6                         | 4.4                                                | 0.7          | 22.5        | 1.8          | 2.8         | 0.3       | 6.0            | 0.1         | 1.9    |
| E1                | 19-Jan-2013   | 50             | 799           | 20228             | 39                       | 94            | 23.3                         | 1.5                                                | 0.0          | 9.9         | 3.6          | 2.3         | 0.6       | 4.7            | 0.1         | 0.6    |
| E5                | 24-Jan-2013   | 50             | 213           | 20561             | 10                       | 92            | 16.9                         | 4.4                                                | 0.0          | 7.8         | 2.5          | 1.7         | 0.1       | 0.1            | 0.1         | 0.1    |
| G0                | 18-Jan-2013   | 50             | 298           | 25547             | 12                       | 92            | 12.2                         | 1.0                                                | 0.0          | 6.9         | 1.8          | 1.8         | 0.2       | 0.3            | 0.0         | 0.1    |
| G4                | 25-Jan-2013   | 50             | 296           | 44986             | 7                        | 92            | 8.2                          | 2.3                                                | 0.0          | 1.9         | 3.2          | 0.4         | 0.1       | 0.2            | 0.0         | 0.1    |
| J1                | 12-Jan-2013   | 30             | 1114          | 11322             | 98                       | 95            | 51.6                         | 1.7                                                | 0.9          | 12.5        | 2.2          | 4.4         | 0.9       | 27.8           | 0.7         | 0.7    |
| J3                | 12-Jan-2013   | 80             | 455           | 24966             | 18                       | 94            | 15.6                         | 1.4                                                | 0.0          | 7.8         | 2.6          | 1.0         | 0.2       | 2.3            | 0.1         | 0.2    |
| Cruise: F13OS/1   |               |                |               |                   |                          |               |                              |                                                    |              |             |              |             |           |                |             |        |
| B3                | 31-May-2013   | 50             | 747           | 22618             | 33.0                     | 91            | 47.1                         | 0.0                                                | 0.4          | 40.5        | 1.3          | 4.8         | 0.0       | 0.0            | 0.0         | 0.0    |
| E1                | 27-May-2013   | 50             | 1648          | 26020             | 63.3                     | 90            | 60.0                         | 0.0                                                | 0.0          | 53.2        | 6.8          | 0.0         | 0.0       | 0.0            | 0.0         | 0.0    |
| E5                | 26-May-2013   | 50             | 5298          | 9414              | 562.8                    | 89            | 465.2                        | 0.0                                                | 0.0          | 397.7       | 22.5         | 22.5        | 0.0       | 0.0            | 0.0         | 22.5   |
| G0                | 25-May-2013   | 50             | 1290          | 21365             | 60.4                     | 89            | 128.0                        | 0.0                                                | 0.0          | 126.4       | 1.6          | 0.0         | 0.0       | 0.0            | 0.0         | 0.0    |
| G4                | 22-May-2013   | 50             | 2121          | 21265             | 99.7                     | 92            | 210.1                        | 6.6                                                | 0.0          | 170.2       | 14.6         | 0.0         | 0.0       | 9.3            | 9.3         | 0.0    |
| I1                | 20-May-2013   | 50             | 1816          | 23081             | 78.7                     | 88            | 70.3                         | 0.0                                                | 0.0          | 65.0        | 5.2          | 0.0         | 0.0       | 0.0            | 0.0         | 0.0    |
| J1                | 19-May-2013   | 30             | 1431          | 23532             | 60.8                     | 92            | 39.9                         | 4.4                                                | 0.0          | 29.7        | 3.4          | 1.9         | 0.0       | 0.0            | 0.5         | 0.0    |
| J3                | 18-May-2013   | 50             | 2155          | 23548             | 91.5                     | 90            | 123.2                        | 0.0                                                | 0.0          | 118.3       | 2.4          | 2.4         | 0.0       | 0.0            | 0.0         | 0.0    |
| Cruise: F13OS/2   |               |                |               |                   |                          |               |                              |                                                    |              |             |              |             |           |                |             |        |
| B3                | 24-Aug-2013   | 50             | 1291          | 13234             | 97.6                     | 94            | 70.9                         | 0.0                                                | 25.4         | 13.0        | 1.3          | 7.8         | 19.5      | 0.0            | 2.6         | 1.3    |
| E1                | 21-Aug-2013   | 50             | 971           | 17470             | 55.6                     | 94            | 41.1                         | 1.5                                                | 4.1          | 6.3         | 1.1          | 12.6        | 13.7      | 0.7            | 0.4         | 0.7    |
| E5                | 22-Aug-2013   | 50             | 616           | 17539             | 35.1                     | 89            | 18.3                         | 0.0                                                | 0.0          | 16.6        | 0.6          | 0.8         | 0.0       | 0.0            | 0.0         | 0.3    |
| G0                | 20-Aug-2013   | 50             | 593           | 20757             | 28.6                     | 91            | 23.3                         | 0.2                                                | 6.1          | 5.9         | 0.8          | 6.1         | 3.8       | 0.1            | 0.3         | 0.0    |
| G4                | 17-Aug-2013   | 50             | 525           | 19546             | 26.9                     | 90            | 20.1                         | 0.0                                                | 0.0          | 14.4        | 3.7          | 1.5         | 0.3       | 0.0            | 0.0         | 0.2    |
| I1                | 15-Aug-2013   | 50             | 877           | 21129             | 41.5                     | 92            | 75.8                         | 3.3                                                | 0.6          | 33.7        | 2.8          | 26.0        | 3.3       | 0.6            | 3.9         | 1.7    |
| J1                | 14-Aug-2013   | 30             | 3063          | 13701             | 223.5                    | 88            | 152.0                        | 0.0                                                | 0.0          | 122.2       | 20.9         | 8.9         | 0.0       | 0.0            | 0.0         | 0.0    |
| J3                | 12-Aug-2013   | 50             | 1507          | 17347             | 86.9                     | 93            | 147.1                        | 3.5                                                | 83.4         | 48.6        | 1.2          | 5.8         | 0.0       | 0.0            | 1.2         | 3.5    |

Table S1 (continued)

| Stn. <sup>a</sup> | Sampling date | Sampling layer | Sample weight | Flow water volume | Biomass                  | Water content | Zooplankton abundance        | Class-level abundance (individual/m <sup>3</sup> ) |              |             |              |             |           |                |              |        |
|-------------------|---------------|----------------|---------------|-------------------|--------------------------|---------------|------------------------------|----------------------------------------------------|--------------|-------------|--------------|-------------|-----------|----------------|--------------|--------|
|                   |               |                |               |                   |                          |               |                              | Hydrozoa                                           | Branchiopoda | Maxillopoda | Malacostraca | Sagittoidea | Thalassia | Appendicularia | Osteichthyes | Others |
|                   | (JST)         | (m)            | (g-wet)       | (m <sup>3</sup> ) | (mg-wet/m <sup>3</sup> ) | (%)           | (individual/m <sup>3</sup> ) |                                                    |              |             |              |             |           |                |              |        |
| Cruise: F13OS/3   |               |                |               |                   |                          |               |                              |                                                    |              |             |              |             |           |                |              |        |
| B3                | 05-Nov-2013   | 50             | 400           | 17556             | 22.8                     | 94            | 19.9                         | 1.0                                                | 0.5          | 11.2        | 1.0          | 5.3         | 0.2       | 0.7            | 0.0          | 0.0    |
| E1                | 09-Nov-2013   | 50             | 1423          | 14922             | 95.4                     | 91            | 103.0                        | 7.6                                                | 2.5          | 62.3        | 2.5          | 21.6        | 1.3       | 3.8            | 0.0          | 1.3    |
| E5                | 14-Nov-2013   | 50             | 637           | 19424             | 32.8                     | 92            | 37.2                         | 2.6                                                | 0.0          | 24.1        | 1.7          | 3.5         | 3.5       | 1.7            | 0.0          | 0.0    |
| G0                | 19-Nov-2013   | 50             | 982           | 10502             | 93.5                     | 92            | 145.8                        | 12.5                                               | 1.2          | 99.7        | 5.0          | 17.5        | 5.0       | 1.2            | 0.0          | 3.7    |
| G4                | 23-Nov-2013   | 50             | 700           | 17722             | 39.5                     | 95            | 42.1                         | 3.2                                                | 3.2          | 24.7        | 1.1          | 6.3         | 3.7       | 0.0            | 0.0          | 0.0    |
| I1                | 11-Nov-2013   | 50             | 616           | 18163             | 33.9                     | 92            | 56.2                         | 2.0                                                | 0.0          | 32.6        | 3.3          | 12.6        | 0.0       | 4.9            | 0.0          | 0.8    |
| J1                | 17-Nov-2013   | 50             | 1694          | 17329             | 97.7                     | 92            | 81.3                         | 4.2                                                | 4.2          | 46.9        | 17.7         | 5.2         | 2.1       | 0.0            | 0.0          | 1.0    |
| J3                | 21-Nov-2013   | 50             | 771           | 16662             | 46.3                     | 91            | 64.2                         | 3.1                                                | 4.9          | 40.1        | 5.6          | 4.9         | 1.9       | 3.1            | 0.0          | 0.6    |
| Cruise: F13OS/4   |               |                |               |                   |                          |               |                              |                                                    |              |             |              |             |           |                |              |        |
| B3                | 27-Jan-2014   | 50             | 541           | 20355             | 26.6                     | 94            | 12.4                         | 1.6                                                | 0.0          | 8.0         | 0.4          | 1.8         | 0.0       | 0.7            | 0.0          | 0.0    |
| E1                | 23-Jan-2014   | 50             | 164           | 31760             | 5.2                      | 93            | 6.3                          | 0.3                                                | 0.0          | 3.9         | 0.3          | 1.2         | 0.0       | 0.5            | 0.1          | 0.0    |
| E5                | 24-Jan-2014   | 50             | 65            | 27989             | 2.3                      | 95            | 0.3                          | 0.1                                                | 0.0          | 0.2         | 0.0          | 0.0         | 0.0       | 0.0            | 0.0          | 0.0    |
| G0                | 18-Jan-2014   | 50             | 220           | 19955             | 11.0                     | 91            | 8.1                          | 0.4                                                | 0.0          | 5.9         | 0.1          | 0.7         | 0.0       | 0.6            | 0.4          | 0.1    |
| G4                | 17-Jan-2014   | 150            | 144           | 39176             | 3.7                      | 94            | 1.0                          | 0.0                                                | 0.0          | 0.7         | 0.0          | 0.1         | 0.0       | 0.0            | 0.0          | 0.2    |
| I1                | 15-Jan-2014   | 50             | 160           | 22781             | 7.0                      | 92            | 4.7                          | 0.4                                                | 0.0          | 3.5         | 0.2          | 0.1         | 0.0       | 0.4            | 0.1          | 0.0    |
| J1                | 13-Jan-2014   | 30             | 313           | 15292             | 20.4                     | 93            | 11.2                         | 0.0                                                | 0.0          | 7.9         | 1.9          | 0.8         | 0.0       | 0.0            | 0.5          | 0.0    |
| J3                | 14-Jan-2014   | 50             | 32            | 28428             | 1.1                      | 82            | 0.4                          | 0.0                                                | 0.0          | 0.2         | 0.0          | 0.1         | 0.0       | 0.0            | 0.0          | 0.0    |
| Cruise: F14OS/1   |               |                |               |                   |                          |               |                              |                                                    |              |             |              |             |           |                |              |        |
| B3                | 14-May-2014   | 50             | 2247          | 18830             | 119.3                    | 88            | 259.3                        | 8.0                                                | 0.0          | 225.9       | 14.3         | 1.6         | 3.2       | 6.4            | 0.0          | 0.0    |
| E1                | 17-May-2014   | 50             | 2041          | 22859             | 89.3                     | 88            | 317.9                        | 4.8                                                | 0.0          | 296.5       | 9.5          | 0.0         | 1.2       | 2.4            | 1.2          | 2.4    |
| E5                | 19-May-2014   | 50             | 2566          | 26475             | 96.9                     | 90            | 119.8                        | 0.0                                                | 0.0          | 115.2       | 1.2          | 2.3         | 0.0       | 0.0            | 0.0          | 1.2    |
| G0                | 24-May-2014   | 50             | 1907          | 26067             | 73.1                     | 91            | 147.5                        | 3.5                                                | 0.0          | 134.3       | 0.9          | 0.0         | 0.0       | 6.1            | 0.9          | 1.8    |
| J1                | 27-May-2014   | 30             | 2152          | 22089             | 97.4                     | 87            | 227.6                        | 4.2                                                | 0.0          | 174.6       | 35.3         | 4.2         | 0.0       | 0.0            | 1.0          | 8.3    |
| Cruise: F14OS/2   |               |                |               |                   |                          |               |                              |                                                    |              |             |              |             |           |                |              |        |
| B3                | 17-Aug-2014   | 50             | 1038          | 20137             | 51.6                     | 90            | 96.1                         | 0.0                                                | 2.5          | 59.0        | 2.9          | 27.2        | 2.5       | 1.2            | 0.0          | 0.8    |
| E1                | 22-Aug-2014   | 50             | 1068          | 20343             | 52.5                     | 92            | 66.6                         | 0.6                                                | 1.7          | 29.7        | 4.5          | 10.1        | 17.9      | 1.1            | 0.6          | 0.6    |
| E5                | 20-Aug-2014   | 50             | 1230          | 17784             | 69.2                     | 93            | 44.5                         | 0.0                                                | 0.0          | 29.1        | 4.7          | 4.4         | 5.0       | 0.0            | 0.0          | 1.4    |
| G0                | 31-Aug-2014   | 50             | 872           | 22416             | 38.9                     | 88            | 58.1                         | 0.0                                                | 2.5          | 25.7        | 0.4          | 23.2        | 1.2       | 0.0            | 0.8          | 4.2    |
| J1                | 30-Aug-2014   | 30             | 1961          | 17656             | 111.1                    | 88            | 349.3                        | 2.7                                                | 92.0         | 145.3       | 26.7         | 50.7        | 18.7      | 0.0            | 13.3         | 0.0    |
| Cruise: F14OS/3   |               |                |               |                   |                          |               |                              |                                                    |              |             |              |             |           |                |              |        |
| B3                | 04-Nov-2014   | 50             | 572           | 16985             | 33.7                     | 91            | 41.2                         | 2.5                                                | 3.8          | 21.1        | 4.4          | 8.2         | 0.3       | 0.3            | 0.0          | 0.6    |
| E1                | 17-Nov-2014   | 50             | 1561          | 15533             | 100.5                    | 93            | 151.4                        | 6.7                                                | 2.7          | 64.3        | 6.7          | 29.5        | 2.7       | 34.8           | 0.0          | 4.0    |
| E5                | 05-Nov-2014   | 50             | 1351          | 15559             | 86.8                     | 94            | 141.7                        | 5.6                                                | 0.0          | 75.0        | 5.6          | 31.9        | 1.4       | 11.1           | 1.4          | 9.7    |
| G0                | 18-Nov-2014   | 50             | 1165          | 16395             | 71.0                     | 92            | 104.6                        | 3.8                                                | 0.8          | 65.9        | 3.0          | 3.8         | 1.5       | 20.5           | 0.8          | 4.5    |
| J1                | 14-Nov-2014   | 30             | 1054          | 12254             | 86.0                     | 93            | 75.0                         | 6.9                                                | 0.0          | 45.4        | 2.8          | 8.3         | 0.7       | 5.5            | 0.7          | 4.8    |
| Cruise: F14OS/4   |               |                |               |                   |                          |               |                              |                                                    |              |             |              |             |           |                |              |        |
| B3                | 03-Feb-2015   | 50             | 252           | 23741             | 10.6                     | 88            | 9.9                          | 0.2                                                | 0.0          | 9.2         | 0.1          | 0.2         | 0.0       | 0.0            | 0.1          | 0.3    |
| E1                | 06-Feb-2015   | 50             | 285           | 25086             | 11.4                     | 92            | 8.1                          | 0.2                                                | 0.0          | 6.5         | 0.3          | 0.3         | 0.0       | 0.5            | 0.0          | 0.4    |
| E5                | 29-Jan-2015   | 50             | 210           | 28381             | 7.4                      | 94            | 4.3                          | 0.2                                                | 0.0          | 3.3         | 0.2          | 0.1         | 0.0       | 0.0            | 0.0          | 0.6    |
| G0                | 26-Jan-2015   | 50             | 79            | 19969             | 4.0                      | 90            | 7.7                          | 0.1                                                | 0.2          | 6.9         | 0.1          | 0.3         | 0.0       | 0.0            | 0.0          | 0.1    |
| J1                | 19-Jan-2015   | 30             | 28            | 24050             | 1.2                      | 91            | 0.9                          | 0.1                                                | 0.0          | 0.4         | 0.3          | 0.1         | 0.0       | 0.0            | 0.0          | 0.0    |

a: See Oikawa et al.<sup>35</sup> and Fig. 1 for the sampling locations.

Table S2. Concentrations of  $^{134}\text{Cs}$  and  $^{137}\text{Cs}$  in zooplankton samples and in seawater samples collected off the east coast of Japan.

| Stn.                        | Zooplankton                      |                                  |                                  |                                  |                                        | Seawater              |                              |                              |
|-----------------------------|----------------------------------|----------------------------------|----------------------------------|----------------------------------|----------------------------------------|-----------------------|------------------------------|------------------------------|
|                             | $^{134}\text{Cs}$<br>(Bq/kg-dry) | $^{137}\text{Cs}$<br>(Bq/kg-dry) | $^{134}\text{Cs}$<br>(Bq/kg-wet) | $^{137}\text{Cs}$<br>(Bq/kg-wet) | aCR of $^{137}\text{Cs}$<br>(L/kg-wet) | Sampling<br>depth (m) | $^{134}\text{Cs}$<br>(mBq/L) | $^{137}\text{Cs}$<br>(mBq/L) |
| Cruise: F13OS/1 (May 2013)  |                                  |                                  |                                  |                                  |                                        |                       |                              |                              |
| B3                          | ND                               | 0.82 ± 0.14                      | ND                               | 0.07 ± 0.01                      | 49                                     | 50                    | ND                           | 1.5 ± 0.2                    |
| E1                          | ND                               | 0.26 ± 0.08                      | ND                               | 0.03 ± 0.01                      | 13                                     | 50                    | ND                           | 2.0 ± 0.2                    |
| E5                          | ND                               | 0.28 ± 0.07                      | ND                               | 0.03 ± 0.01                      | 20                                     | 50                    | ND                           | 1.5 ± 0.2                    |
| G0                          | 0.92 ± 0.12                      | 1.99 ± 0.13                      | 0.10 ± 0.01                      | 0.22 ± 0.01                      | 136                                    | 50                    | ND                           | 1.6 ± 0.2                    |
| G4                          | LTD                              | 0.36 ± 0.08                      | LTD                              | 0.03 ± 0.01                      | 13                                     | 50                    | ND                           | 2.3 ± 0.2                    |
| I1                          | 0.61 ± 0.07                      | 1.03 ± 0.08                      | 0.07 ± 0.01                      | 0.12 ± 0.01                      | 69                                     | 50                    | ND                           | 1.8 ± 0.2                    |
| J1                          | 1.51 ± 0.14                      | 2.59 ± 0.15                      | 0.12 ± 0.01                      | 0.20 ± 0.01                      | 26                                     | 37                    | 3.2 ± 0.2                    | 7.8 ± 0.3                    |
| J3                          | ND                               | 0.45 ± 0.07                      | ND                               | 0.04 ± 0.01                      | 23                                     | 50                    | 0.5 ± 0.2                    | 1.9 ± 0.2                    |
| Cruise: F13OS/2 (Aug. 2013) |                                  |                                  |                                  |                                  |                                        |                       |                              |                              |
| B3                          | 0.65 ± 0.13                      | 1.73 ± 0.14                      | 0.04 ± 0.01                      | 0.11 ± 0.01                      | 56                                     | 50                    | ND                           | 1.9 ± 0.2                    |
| E1                          | 1.52 ± 0.22                      | 3.12 ± 0.22                      | 0.09 ± 0.01                      | 0.18 ± 0.01                      | 128                                    | 50                    | ND                           | 1.4 ± 0.2                    |
| E5                          | 0.46 ± 0.15                      | 0.95 ± 0.14                      | 0.05 ± 0.02                      | 0.11 ± 0.02                      | 66                                     | 50                    | ND                           | 1.6 ± 0.2                    |
| G0                          | 1.45 ± 0.26                      | 3.09 ± 0.24                      | 0.12 ± 0.02                      | 0.26 ± 0.02                      | 68                                     | 50                    | 1.1 ± 0.2                    | 3.9 ± 0.2                    |
| G4                          | 0.97 ± 0.19                      | 1.72 ± 0.18                      | 0.09 ± 0.02                      | 0.17 ± 0.02                      | 104                                    | 50                    | ND                           | 1.6 ± 0.2                    |
| I1                          | 3.94 ± 0.18                      | 8.79 ± 0.20                      | 0.32 ± 0.01                      | 0.72 ± 0.02                      | 481                                    | 50                    | ND                           | 1.5 ± 0.2                    |
| J1                          | 1.97 ± 0.10                      | 4.12 ± 0.11                      | 0.23 ± 0.01                      | 0.48 ± 0.01                      | 66                                     | 38                    | 2.8 ± 0.3                    | 7.3 ± 0.3                    |
| J3                          | <u>0.50 ± 0.13</u>               | <u>0.73 ± 0.12</u>               | <u>0.03 ± 0.01</u>               | <u>0.05 ± 0.01</u>               | <u>18</u>                              | 50                    | ND                           | 2.7 ± 0.2                    |
| Cruise: F13OS/3 (Nov. 2013) |                                  |                                  |                                  |                                  |                                        |                       |                              |                              |
| B3                          | ND                               | 0.65 ± 0.11                      | ND                               | 0.04 ± 0.01                      | 19                                     | 50                    | ND                           | 2.0 ± 0.1                    |
| E1                          | 0.72 ± 0.22                      | 2.23 ± 0.26                      | 0.07 ± 0.02                      | 0.21 ± 0.02                      | 80                                     | 50                    | 0.7 ± 0.2                    | 2.6 ± 0.2                    |
| E5                          | ND                               | <u>2.57 ± 0.44</u>               | ND                               | <u>0.20 ± 0.03</u>               | <u>93</u>                              | 50                    | ND                           | 2.1 ± 0.2                    |
| G0                          | 3.50 ± 0.35                      | 7.25 ± 0.39                      | 0.29 ± 0.03                      | 0.61 ± 0.03                      | 264                                    | 50                    | ND                           | 2.3 ± 0.2                    |
| G4                          | <u>3.44 ± 0.53</u>               | <u>6.94 ± 0.58</u>               | <u>0.19 ± 0.03</u>               | <u>0.38 ± 0.03</u>               | <u>159</u>                             | 200                   | ND                           | 2.4 ± 0.2                    |
| I1                          | ND                               | ND ±                             | ND                               | ND                               | —                                      | 50                    | ND                           | 3.0 ± 0.2                    |
| J1                          | ND                               | 0.78 ± 0.22                      | ND                               | 0.06 ± 0.02                      | 23                                     | 39                    | ND                           | 2.6 ± 0.2                    |
| J3                          | ND                               | 1.18 ± 0.32                      | ND                               | 0.10 ± 0.03                      | 31                                     | 50                    | 0.8 ± 0.2                    | 3.4 ± 0.2                    |
| Cruise: F13OS/4 (Jan. 2014) |                                  |                                  |                                  |                                  |                                        |                       |                              |                              |
| B3                          | <u>8.34 ± 0.70</u>               | <u>20.2 ± 0.9</u>                | <u>0.49 ± 0.04</u>               | <u>1.18 ± 0.05</u>               | <u>392</u>                             | 50                    | ND                           | 3.0 ± 0.2                    |
| E1                          | 3.64 ± 0.71                      | 6.62 ± 0.72                      | 0.26 ± 0.05                      | 0.48 ± 0.05                      | 251                                    | 50                    | ND                           | 1.9 ± 0.2                    |
| E5                          | <u>12.9 ± 1.1</u>                | <u>33.3 ± 1.1</u>                | <u>0.68 ± 0.06</u>               | <u>1.76 ± 0.06</u>               | <u>801</u>                             | 50                    | ND                           | 2.2 ± 0.2                    |
| G0                          | 5.14 ± 0.90                      | 12.4 ± 0.9                       | 0.47 ± 0.08                      | 1.12 ± 0.08                      | 163                                    | 50                    | 1.9 ± 0.2                    | 6.9 ± 0.2                    |
| G4                          | ND                               | <u>6.59 ± 1.63</u>               | ND                               | <u>0.38 ± 0.09</u>               | <u>189</u>                             | 50                    | ND                           | 2.0 ± 0.2                    |
| I1                          | LTD                              | 9.00 ± 0.70                      | LTD                              | 0.70 ± 0.05                      | 54                                     | 50                    | 5.0 ± 0.3                    | 13.0 ± 0.4                   |
| J1                          | 4.47 ± 0.70                      | 8.65 ± 0.74                      | 0.31 ± 0.05                      | 0.60 ± 0.05                      | 74                                     | 40                    | 2.6 ± 0.3                    | 8.2 ± 0.3                    |
| J3                          | <u>17.1 ± 1.9</u>                | <u>40.3 ± 1.9</u>                | <u>3.14 ± 0.36</u>               | <u>7.39 ± 0.34</u>               | <u>2957</u>                            | 100                   | ND                           | 2.5 ± 0.2                    |

Table S2 (continued)

| Stn.                             | Zooplankton                      |                                  |                                  |                                  |                                        | Seawater              |                              |                              |
|----------------------------------|----------------------------------|----------------------------------|----------------------------------|----------------------------------|----------------------------------------|-----------------------|------------------------------|------------------------------|
|                                  | <sup>134</sup> Cs<br>(Bq/kg-dry) | <sup>137</sup> Cs<br>(Bq/kg-dry) | <sup>134</sup> Cs<br>(Bq/kg-wet) | <sup>137</sup> Cs<br>(Bq/kg-wet) | aCR of <sup>137</sup> Cs<br>(L/kg-wet) | Sampling<br>depth (m) | <sup>134</sup> Cs<br>(mBq/L) | <sup>137</sup> Cs<br>(mBq/L) |
| Cruise: F14OS/1 (May 2014)       |                                  |                                  |                                  |                                  |                                        |                       |                              |                              |
| B3                               | 0.74 ± 0.15                      | 2.06 ± 0.19                      | 0.09 ± 0.02                      | 0.24 ± 0.02                      | 45                                     | 50                    | 1.7 ± 0.3                    | 5.4 ± 0.2                    |
| E1                               | 7.90 ± 0.26                      | 19.9 ± 0.4                       | 0.95 ± 0.03                      | 2.38 ± 0.05                      | 661                                    | 50                    | 1.0 ± 0.3                    | 3.6 ± 0.2                    |
| E5                               | 1.07 ± 0.15                      | 2.96 ± 0.19                      | 0.11 ± 0.02                      | 0.30 ± 0.02                      | 213                                    | 50                    | ND                           | 1.4 ± 0.2                    |
| G0                               | ND                               | 1.20 ± 0.19                      | ND                               | 0.11 ± 0.02                      | 39                                     | 50                    | ND                           | 2.8 ± 0.2                    |
| J1                               | 1.20 ± 0.16                      | 3.38 ± 0.21                      | 0.15 ± 0.02                      | 0.43 ± 0.03                      | 96                                     | 39                    | 1.5 ± 0.2                    | 4.5 ± 0.2                    |
| Cruise: F14OS/2 (Aug. 2014)      |                                  |                                  |                                  |                                  |                                        |                       |                              |                              |
| B3                               | LTD                              | 2.35 ± 0.19                      | LTD                              | 0.24 ± 0.02                      | 141                                    | 50                    | ND                           | 1.7 ± 0.2                    |
| E1                               | 0.43 ± 0.12                      | 0.58 ± 0.13                      | 0.04 ± 0.01                      | 0.05 ± 0.01                      | 25                                     | 50                    | ND                           | 1.9 ± 0.2                    |
| E5                               | ND                               | LTD                              | ND                               | LTD                              | —                                      | 50                    | ND                           | 1.9 ± 0.2                    |
| G0                               | 0.46 ± 0.14                      | 1.64 ± 0.15                      | 0.05 ± 0.02                      | 0.19 ± 0.02                      | 90                                     | 50                    | ND                           | 2.1 ± 0.2                    |
| J1                               | 0.59 ± 0.09                      | 1.54 ± 0.10                      | 0.07 ± 0.01                      | 0.18 ± 0.01                      | 77                                     | 40                    | ND                           | 2.4 ± 0.2                    |
| Cruise: F14OS/3 (Nov. 2014)      |                                  |                                  |                                  |                                  |                                        |                       |                              |                              |
| B3                               | 1.15 ± 0.17                      | 3.88 ± 0.19                      | 0.10 ± 0.01                      | 0.34 ± 0.02                      | 188                                    | 50                    | ND                           | 1.8 ± 0.2                    |
| E1                               | 1.28 ± 0.15                      | 3.01 ± 0.15                      | 0.09 ± 0.01                      | 0.21 ± 0.01                      | 97                                     | 50                    | ND                           | 2.2 ± 0.2                    |
| E5                               | 1.45 ± 0.18                      | 3.54 ± 0.15                      | 0.09 ± 0.01                      | 0.22 ± 0.01                      | 96                                     | 50                    | ND                           | 2.3 ± 0.2                    |
| G0                               | 0.86 ± 0.11                      | 2.80 ± 0.12                      | 0.07 ± 0.01                      | 0.23 ± 0.01                      | 92                                     | 50                    | ND                           | 2.5 ± 0.2                    |
| J1                               | 0.74 ± 0.17                      | 2.26 ± 0.18                      | 0.05 ± 0.01                      | 0.16 ± 0.01                      | 68                                     | 33                    | ND                           | 2.3 ± 0.2                    |
| Cruise: F14OS/4 (Jan.-Feb. 2015) |                                  |                                  |                                  |                                  |                                        |                       |                              |                              |
| B3                               | ND                               | 2.61 ± 0.43                      | ND                               | 0.31 ± 0.05                      | 157                                    | 50                    | ND                           | 2.0 ± 0.2                    |
| E1                               | LTD                              | 3.38 ± 0.43                      | LTD                              | 0.26 ± 0.03                      | 103                                    | 50                    | ND                           | 2.5 ± 0.2                    |
| E5                               | 2.27 ± 0.49                      | 2.29 ± 0.49                      | 0.14 ± 0.03                      | 0.15 ± 0.03                      | 76                                     | 50                    | ND                           | 1.9 ± 0.2                    |
| G0                               | 2.78 ± 0.92                      | 7.29 ± 0.66                      | 0.29 ± 0.09                      | 0.75 ± 0.07                      | 140                                    | 50                    | 1.5 ± 0.2                    | 5.4 ± 0.3                    |
| J1                               | ND                               | 13.8 ± 1.5                       | ND                               | 1.26 ± 0.14                      | 350                                    | 37                    | ND                           | 3.6 ± 0.2                    |

Underlined numbers indicate the samples containing a portion of phytoplankton.

ND: not detected or below the detection limit.

LTD: below 3σ of the counting statistics.

Table S3. Concentrations of  $^{133}\text{Cs}$  and aluminum (Al) and  $^{137}\text{Cs}/^{133}\text{Cs}$  ratios in zooplankton samples and concentrations of  $^{133}\text{Cs}$  and  $^{137}\text{Cs}/^{133}\text{Cs}$  ratios in seawater samples.

| Stn.                             | Zooplankton       |                         |                                   | Seawater          |                                   |
|----------------------------------|-------------------|-------------------------|-----------------------------------|-------------------|-----------------------------------|
|                                  | $^{133}\text{Cs}$ | Al                      | $^{137}\text{Cs}/^{133}\text{Cs}$ | $^{133}\text{Cs}$ | $^{137}\text{Cs}/^{133}\text{Cs}$ |
|                                  | (ng/g-dry)        | ( $\mu\text{g/g-dry}$ ) | ( $\times 10^{-7}$ )              | (ng/L)            | ( $\times 10^{-9}$ )              |
| Cruise: F12OS/1 (May 2012)       |                   |                         |                                   |                   |                                   |
| B3                               | 54 $\pm$ 10       | 336 $\pm$ 36            | 0.18 $\pm$ 0.06                   | —                 | 5.0 $\pm$ 0.3                     |
| E1                               | 31 $\pm$ 3        | 23 $\pm$ 8              | 0.17 $\pm$ 0.04                   | —                 | 5.9 $\pm$ 0.3                     |
| E5                               | 31 $\pm$ 1        | 40 $\pm$ 5              | 0.17 $\pm$ 0.04                   | —                 | 5.3 $\pm$ 0.3                     |
| G0                               | 46 $\pm$ 6        | 201 $\pm$ 18            | 1.47 $\pm$ 0.21                   | —                 | 18.7 $\pm$ 1.1                    |
| G4                               | 39 $\pm$ 2        | 94 $\pm$ 13             | 0.48 $\pm$ 0.05                   | —                 | 7.4 $\pm$ 0.4                     |
| J1                               | 140 $\pm$ 6       | 1667 $\pm$ 301          | 4.11 $\pm$ 0.21                   | —                 | 16.8 $\pm$ 1.0                    |
| J3                               | 61 $\pm$ 4        | 346 $\pm$ 13            | 1.09 $\pm$ 0.08                   | —                 | 8.5 $\pm$ 0.5                     |
| Cruise: F12OS/2 (Aug. 2012)      |                   |                         |                                   |                   |                                   |
| B3                               | 37 $\pm$ 4        | 39 $\pm$ 4              | 0.10 $\pm$ 0.02                   | —                 | 1.9 $\pm$ 0.1                     |
| E1                               | 87 $\pm$ 22       | 42 $\pm$ 2              | —                                 | —                 | 2.8 $\pm$ 0.2                     |
| E5                               | 62 $\pm$ 11       | 208 $\pm$ 20            | —                                 | —                 | 3.4 $\pm$ 0.2                     |
| G0                               | 39 $\pm$ 11       | 42 $\pm$ 14             | 0.26 $\pm$ 0.08                   | —                 | 4.3 $\pm$ 0.3                     |
| G4                               | 54 $\pm$ 15       | 345 $\pm$ 55            | 0.94 $\pm$ 0.27                   | —                 | 4.0 $\pm$ 0.2                     |
| J1                               | 65 $\pm$ 34       | 62 $\pm$ 11             | 0.46 $\pm$ 0.24                   | —                 | 13.8 $\pm$ 0.8                    |
| J3                               | 40 $\pm$ 7        | 72 $\pm$ 22             | 0.24 $\pm$ 0.06                   | —                 | 4.0 $\pm$ 0.2                     |
| Cruise: F12OS/3 (Oct.-Nov. 2012) |                   |                         |                                   |                   |                                   |
| B3                               | 46 $\pm$ 11       | 64 $\pm$ 23             | 0.10 $\pm$ 0.03                   | —                 | 3.2 $\pm$ 0.2                     |
| E1                               | 42 $\pm$ 4        | 122 $\pm$ 31            | 0.46 $\pm$ 0.06                   | —                 | 5.0 $\pm$ 0.3                     |
| E5                               | 47 $\pm$ 32       | 45 $\pm$ 5              | —                                 | —                 | 2.7 $\pm$ 0.2                     |
| G0                               | 32 $\pm$ 3        | 62 $\pm$ 16             | 1.27 $\pm$ 0.14                   | —                 | 3.7 $\pm$ 0.2                     |
| G4                               | 34 $\pm$ 2        | 38 $\pm$ 6              | 0.45 $\pm$ 0.04                   | —                 | 2.2 $\pm$ 0.1                     |
| J1                               | 92 $\pm$ 3        | 810 $\pm$ 42            | 0.49 $\pm$ 0.02                   | —                 | 5.2 $\pm$ 0.4                     |
| Cruise: F12OS/4 (Jan. 2013)      |                   |                         |                                   |                   |                                   |
| B3                               | 379 $\pm$ 50      | 4996 $\pm$ 464          | 0.25 $\pm$ 0.03                   | —                 | 3.2 $\pm$ 0.2                     |
| E1                               | 60 $\pm$ 7        | 386 $\pm$ 23            | 3.00 $\pm$ 0.34                   | —                 | 2.6 $\pm$ 0.1                     |
| E5                               | 53 $\pm$ 1        | 234 $\pm$ 12            | 0.17 $\pm$ 0.05                   | —                 | 2.6 $\pm$ 0.1                     |
| G0                               | 92 $\pm$ 7        | 706 $\pm$ 68            | 0.30 $\pm$ 0.04                   | —                 | 3.1 $\pm$ 0.2                     |
| G4                               | 66 $\pm$ 10       | 382 $\pm$ 42            | 0.12 $\pm$ 0.04                   | —                 | 2.8 $\pm$ 0.2                     |
| J1                               | 174 $\pm$ 8       | 1986 $\pm$ 123          | 0.91 $\pm$ 0.05                   | —                 | 4.1 $\pm$ 0.3                     |
| J3                               | 77 $\pm$ 5        | 751 $\pm$ 36            | 0.24 $\pm$ 0.03                   | —                 | 3.7 $\pm$ 0.3                     |
| Cruise: F13OS/1 (May 2013)       |                   |                         |                                   |                   |                                   |
| B3                               | 47 $\pm$ 3        | 107 $\pm$ 19            | 0.05 $\pm$ 0.01                   | —                 | 1.5 $\pm$ 0.2                     |
| E1                               | 37 $\pm$ 8        | 18 $\pm$ 4              | 0.02 $\pm$ 0.01                   | —                 | 2.0 $\pm$ 0.2                     |
| E5                               | 32 $\pm$ 3        | 18 $\pm$ 6              | 0.03 $\pm$ 0.01                   | —                 | 1.5 $\pm$ 0.2                     |
| G0                               | 37 $\pm$ 1        | 75 $\pm$ 83             | 0.17 $\pm$ 0.01                   | —                 | 1.6 $\pm$ 0.2                     |
| G4                               | 32 $\pm$ 5        | 103 $\pm$ 113           | 0.03 $\pm$ 0.01                   | —                 | 2.3 $\pm$ 0.2                     |
| I1                               | 60 $\pm$ 36       | 51 $\pm$ 3              | 0.05 $\pm$ 0.03                   | —                 | 1.8 $\pm$ 0.2                     |
| J1                               | 79 $\pm$ 30       | 91 $\pm$ 9              | 0.10 $\pm$ 0.04                   | —                 | 7.7 $\pm$ 0.3                     |
| J3                               | 47 $\pm$ 20       | 72 $\pm$ 25             | 0.03 $\pm$ 0.01                   | —                 | 1.9 $\pm$ 0.2                     |
| Cruise: F13OS/2 (Aug. 2013)      |                   |                         |                                   |                   |                                   |
| B3                               | 55 $\pm$ 14       | 172 $\pm$ 13            | 0.10 $\pm$ 0.03                   | —                 | 1.9 $\pm$ 0.2                     |
| E1                               | 71 $\pm$ 25       | 158 $\pm$ 5             | 0.14 $\pm$ 0.05                   | —                 | 1.4 $\pm$ 0.2                     |
| E5                               | 46 $\pm$ 14       | 126 $\pm$ 9             | 0.07 $\pm$ 0.02                   | —                 | 1.6 $\pm$ 0.2                     |
| G0                               | 67 $\pm$ 12       | 145 $\pm$ 5             | 0.14 $\pm$ 0.03                   | —                 | 3.8 $\pm$ 0.2                     |
| G4                               | 47 $\pm$ 5        | 140 $\pm$ 7             | 0.11 $\pm$ 0.02                   | —                 | 1.6 $\pm$ 0.2                     |
| I1                               | 88 $\pm$ 18       | 260 $\pm$ 4             | 0.31 $\pm$ 0.06                   | —                 | 1.5 $\pm$ 0.2                     |
| J1                               | 73 $\pm$ 20       | 139 $\pm$ 11            | 0.18 $\pm$ 0.05                   | —                 | 7.2 $\pm$ 0.3                     |
| J3                               | 46 $\pm$ 2        | 133 $\pm$ 21            | 0.05 $\pm$ 0.01                   | —                 | 2.7 $\pm$ 0.2                     |

Table S3 (continued)

| Stn.                             | Zooplankton       |                         |                                   | Seawater          |                                   |
|----------------------------------|-------------------|-------------------------|-----------------------------------|-------------------|-----------------------------------|
|                                  | $^{133}\text{Cs}$ | Al                      | $^{137}\text{Cs}/^{133}\text{Cs}$ | $^{133}\text{Cs}$ | $^{137}\text{Cs}/^{133}\text{Cs}$ |
|                                  | (ng/g-dry)        | ( $\mu\text{g/g-dry}$ ) | ( $\times 10^{-7}$ )              | (ng/L)            | ( $\times 10^{-9}$ )              |
| Cruise: F13OS/3 (Nov. 2013)      |                   |                         |                                   |                   |                                   |
| B3                               | 53 $\pm$ 5        | 125 $\pm$ 6             | 0.04 $\pm$ 0.01                   | —                 | 2.0 $\pm$ 0.1                     |
| E1                               | 51 $\pm$ 3        | 87 $\pm$ 4              | 0.14 $\pm$ 0.02                   | —                 | 2.6 $\pm$ 0.2                     |
| E5                               | 44 $\pm$ 4        | 138 $\pm$ 13            | 0.18 $\pm$ 0.03                   | —                 | 2.1 $\pm$ 0.2                     |
| G0                               | 54 $\pm$ 5        | 147 $\pm$ 11            | 0.42 $\pm$ 0.04                   | —                 | 2.3 $\pm$ 0.2                     |
| G4                               | 111 $\pm$ 70      | 512 $\pm$ 10            | 0.19 $\pm$ 0.12                   | —                 | 2.4 $\pm$ 0.2                     |
| I1                               | 90 $\pm$ 45       | 111 $\pm$ 12            | —                                 | —                 | 3.0 $\pm$ 0.2                     |
| J1                               | 72 $\pm$ 27       | 152 $\pm$ 8             | 0.03 $\pm$ 0.02                   | —                 | 2.6 $\pm$ 0.2                     |
| J3                               | 80 $\pm$ 29       | 291 $\pm$ 13            | 0.05 $\pm$ 0.02                   | —                 | 3.4 $\pm$ 0.2                     |
| Cruise: F13OS/4 (Jan. 2014)      |                   |                         |                                   |                   |                                   |
| B3                               | 261 $\pm$ 24      | 3042 $\pm$ 123          | 0.24 $\pm$ 0.02                   | —                 | 3.0 $\pm$ 0.2                     |
| E1                               | 76 $\pm$ 13       | 353 $\pm$ 22            | 0.27 $\pm$ 0.05                   | —                 | 1.9 $\pm$ 0.2                     |
| E5                               | 214 $\pm$ 7       | 2209 $\pm$ 27           | 0.49 $\pm$ 0.02                   | —                 | 2.2 $\pm$ 0.2                     |
| G0                               | 73 $\pm$ 8        | 326 $\pm$ 11            | 0.53 $\pm$ 0.07                   | —                 | 6.8 $\pm$ 0.3                     |
| G4                               | 153 $\pm$ 29      | 854 $\pm$ 21            | 0.13 $\pm$ 0.04                   | —                 | 2.0 $\pm$ 0.2                     |
| I1                               | 109 $\pm$ 7       | 400 $\pm$ 15            | 0.26 $\pm$ 0.03                   | —                 | 12.8 $\pm$ 0.5                    |
| J1                               | 70 $\pm$ 3        | 342 $\pm$ 14            | 0.39 $\pm$ 0.04                   | —                 | 8.1 $\pm$ 0.3                     |
| J3                               | 259 $\pm$ 13      | 2452 $\pm$ 23           | 0.49 $\pm$ 0.03                   | —                 | 2.5 $\pm$ 0.2                     |
| Cruise: F14OS/1 (May 2014)       |                   |                         |                                   |                   |                                   |
| B3                               | 52 $\pm$ 9        | 81 $\pm$ 2              | 0.12 $\pm$ 0.02                   | —                 | 5.3 $\pm$ 0.3                     |
| E1                               | 46 $\pm$ 1        | 42 $\pm$ 3              | 1.36 $\pm$ 0.04                   | —                 | 3.6 $\pm$ 0.2                     |
| E5                               | 34 $\pm$ 3        | 38 $\pm$ 2              | 0.27 $\pm$ 0.03                   | —                 | 1.4 $\pm$ 0.2                     |
| G0                               | 28 $\pm$ 25       | 75 $\pm$ 92             | 0.13 $\pm$ 0.12                   | —                 | 2.8 $\pm$ 0.2                     |
| J1                               | 60 $\pm$ 10       | 135 $\pm$ 6             | 0.18 $\pm$ 0.03                   | —                 | 4.4 $\pm$ 0.2                     |
| Cruise: F14OS/2 (Aug. 2014)      |                   |                         |                                   |                   |                                   |
| B3                               | 55 $\pm$ 2        | 119 $\pm$ 7             | 0.13 $\pm$ 0.01                   | —                 | 1.7 $\pm$ 0.2                     |
| E1                               | 41 $\pm$ 4        | 90 $\pm$ 3              | 0.04 $\pm$ 0.01                   | —                 | 1.9 $\pm$ 0.2                     |
| E5                               | 39 $\pm$ 3        | 41 $\pm$ 7              | —                                 | —                 | 1.9 $\pm$ 0.2                     |
| G0                               | 44 $\pm$ 1        | 91 $\pm$ 4              | 0.12 $\pm$ 0.01                   | —                 | 2.1 $\pm$ 0.2                     |
| J1                               | 41 $\pm$ 1        | 57 $\pm$ 1              | 0.12 $\pm$ 0.01                   | —                 | 2.4 $\pm$ 0.2                     |
| Cruise: F14OS/3 (Nov. 2014)      |                   |                         |                                   |                   |                                   |
| B3                               | 42 $\pm$ 5        | 244 $\pm$ 8             | 0.29 $\pm$ 0.04                   | 325 $\pm$ 2       | 1.8 $\pm$ 0.2                     |
| E1                               | 36 $\pm$ 4        | 113 $\pm$ 24            | 0.26 $\pm$ 0.04                   | 329 $\pm$ 24      | 2.2 $\pm$ 0.2                     |
| E5                               | 36 $\pm$ 3        | 206 $\pm$ 17            | 0.31 $\pm$ 0.03                   | 315 $\pm$ 5       | 2.3 $\pm$ 0.2                     |
| G0                               | 29 $\pm$ 1        | 70 $\pm$ 10             | 0.30 $\pm$ 0.02                   | 310 $\pm$ 1       | 2.5 $\pm$ 0.2                     |
| J1                               | 26 $\pm$ 2        | 133 $\pm$ 4             | 0.27 $\pm$ 0.03                   | 315 $\pm$ 11      | 2.3 $\pm$ 0.2                     |
| Cruise: F14OS/4 (Jan.-Feb. 2015) |                   |                         |                                   |                   |                                   |
| B3                               | 147 $\pm$ 7       | 2241 $\pm$ 393          | 0.06 $\pm$ 0.01                   | 319 $\pm$ 10      | 2.0 $\pm$ 0.2                     |
| E1                               | 104 $\pm$ 6       | 1657 $\pm$ 151          | 0.10 $\pm$ 0.01                   | 310 $\pm$ 1       | 2.5 $\pm$ 0.2                     |
| E5                               | 28 $\pm$ 13       | 193 $\pm$ 28            | 0.26 $\pm$ 0.13                   | 307 $\pm$ 0.3     | 1.9 $\pm$ 0.2                     |
| G0                               | 67 $\pm$ 3        | 365 $\pm$ 17            | 0.34 $\pm$ 0.04                   | 315 $\pm$ 6       | 5.3 $\pm$ 0.3                     |
| J1                               | 143 $\pm$ 21      | 1424 $\pm$ 94           | 0.30 $\pm$ 0.06                   | 317 $\pm$ 6       | 3.6 $\pm$ 0.2                     |

Table S4. Comparison of  $^{133}\text{Cs}$  concentrations in zooplankton collected in coastal and offshore waters near Japan.

| Concentration (ng/g-dry)                  | Sampling date                | Locations                                             | References                    |
|-------------------------------------------|------------------------------|-------------------------------------------------------|-------------------------------|
| 73                                        | Sep. 1984                    | Japan Sea                                             | Masuzawa et al. <sup>10</sup> |
| 12 to 447 (average $\pm$ SD: 77 $\pm$ 97) | 23 June 1992 to 8 Feb. 1994  | off the Misaki coast (Kanagawa pref.)                 | Tateda <sup>11</sup>          |
| 16 to 189 (average $\pm$ SD: 71 $\pm$ 47) | 22 July 2011 to 15 Nov. 2013 | Sendai Bay (Miyagi pref.)                             | Kaeriyama et al. <sup>6</sup> |
| 27 to 154 (average $\pm$ SD: 58 $\pm$ 43) | 19 Apr. 2012 to 7 Aug. 2012  | Joban-Sanriku coast (Fukushima and nearby prefecture) | Kaeriyama et al. <sup>6</sup> |
| 26 to 379 (average $\pm$ SD: 72 $\pm$ 59) | 16 May 2012 to 6 Feb. 2015   | offshore of Fukushima and nearby prefectures          | This study                    |

Table S5. Concentration of  $^{137}\text{Cs}$ ,  $^{133}\text{Cs}$ , and aluminum (Al) in surface sediments and assumed contribution of resuspended sediments to  $^{137}\text{Cs}$  and  $^{133}\text{Cs}$  in zooplankton.

| Stn.                             | $^{137}\text{Cs}$ | $^{133}\text{Cs}$       | Al   | $^{137}\text{Cs}$ from sediments |      | $^{133}\text{Cs}$ from sediments |      |
|----------------------------------|-------------------|-------------------------|------|----------------------------------|------|----------------------------------|------|
|                                  | (Bq/kg-dry)       | ( $\mu\text{g/g-dry}$ ) |      | (Bq/kg-dry)                      | (%)  | (ng/g-dry)                       | (%)  |
| Cruise: F12OS/1 (May 2012)       |                   |                         |      |                                  |      |                                  |      |
| B3                               | 220 $\pm$ 1.0     | —                       | 63.8 | 1.2 $\pm$ 0.1                    | 37.3 | 15 $\pm$ 3                       | 27.3 |
| E1                               | 140 $\pm$ 0.7     | —                       | 63.3 | 0.051 $\pm$ 0.017                | 3.0  | 0.92 $\pm$ 0.39                  | 3.0  |
| E5                               | 9 $\pm$ 0.2       | —                       | 64.3 | 0.0058 $\pm$ 0.0007              | 0.3  | 2.5 $\pm$ 0.5                    | 8.2  |
| G0                               | 250 $\pm$ 1.0     | —                       | 66.5 | 0.76 $\pm$ 0.07                  | 3.5  | 9.1 $\pm$ 1.5                    | 19.8 |
| G4                               | 56 $\pm$ 0.5      | —                       | 64.6 | 0.082 $\pm$ 0.011                | 1.4  | 5.1 $\pm$ 1.6                    | 13.1 |
| J1                               | 37 $\pm$ 0.3      | —                       | 55.6 | 1.1 $\pm$ 0.2                    | 0.6  | 39 $\pm$ 7                       | 27.6 |
| J3                               | 54 $\pm$ 0.5      | —                       | 60.6 | 0.31 $\pm$ 0.01                  | 1.5  | 19 $\pm$ 2                       | 31.5 |
| Cruise: F12OS/2 (Aug. 2012)      |                   |                         |      |                                  |      |                                  |      |
| B3                               | 220 $\pm$ 0.9     | —                       | 71.5 | 0.12 $\pm$ 0.01                  | 9.8  | 1.7 $\pm$ 0.3                    | 4.6  |
| E1                               | 240 $\pm$ 0.9     | —                       | 66.9 | —                                | —    | 1.7 $\pm$ 0.5                    | 1.9  |
| E5                               | 8 $\pm$ 0.2       | —                       | 69.9 | —                                | —    | 13 $\pm$ 2                       | 21.2 |
| G0                               | 190 $\pm$ 0.7     | —                       | 68.4 | 0.12 $\pm$ 0.04                  | 3.6  | 1.9 $\pm$ 0.7                    | 4.9  |
| G4                               | 34 $\pm$ 0.4      | —                       | 67.4 | 0.17 $\pm$ 0.03                  | 1.1  | 19 $\pm$ 6                       | 34.6 |
| J1                               | 46 $\pm$ 0.3      | —                       | 41.6 | 0.068 $\pm$ 0.012                | 0.7  | 1.4 $\pm$ 0.3                    | 2.2  |
| J3                               | 32 $\pm$ 0.4      | —                       | 62.8 | 0.037 $\pm$ 0.011                | 1.2  | 4.0 $\pm$ 1.2                    | 10.0 |
| Cruise: F12OS/3 (Oct.-Nov. 2012) |                   |                         |      |                                  |      |                                  |      |
| B3                               | 200 $\pm$ 0.8     | —                       | 74.6 | 0.17 $\pm$ 0.06                  | 12.2 | 2.8 $\pm$ 1.1                    | 6.1  |
| E1                               | 110 $\pm$ 0.6     | —                       | 70.4 | 0.19 $\pm$ 0.05                  | 3.1  | 4.9 $\pm$ 1.8                    | 11.6 |
| E5                               | 9 $\pm$ 0.2       | —                       | 73.1 | —                                | —    | 2.8 $\pm$ 0.5                    | 6.0  |
| G0                               | 170 $\pm$ 0.8     | —                       | 72.6 | 0.15 $\pm$ 0.04                  | 1.1  | 2.8 $\pm$ 0.8                    | 8.8  |
| G4                               | 49 $\pm$ 0.4      | —                       | 69.5 | 0.027 $\pm$ 0.004                | 0.6  | 2.1 $\pm$ 0.7                    | 6.1  |
| J1                               | 23 $\pm$ 0.2      | —                       | 30.1 | 0.62 $\pm$ 0.03                  | 4.2  | 19 $\pm$ 2                       | 20.4 |
| Cruise: F12OS/4 (Jan. 2013)      |                   |                         |      |                                  |      |                                  |      |
| B3                               | 197 $\pm$ 0.8     | —                       | 69.8 | 14 $\pm$ 1                       | 46.8 | 219 $\pm$ 40                     | 57.8 |
| E1                               | 95 $\pm$ 0.6      | —                       | 65.2 | 0.56 $\pm$ 0.03                  | 1.0  | 15 $\pm$ 4                       | 25.5 |
| E5                               | 6 $\pm$ 0.2       | —                       | 67.2 | 0.022 $\pm$ 0.001                | 0.8  | 15 $\pm$ 2                       | 27.9 |
| G0                               | 100 $\pm$ 0.6     | —                       | 68.3 | 1.0 $\pm$ 0.1                    | 11.9 | 32 $\pm$ 5                       | 34.8 |
| G4                               | 11 $\pm$ 0.2      | —                       | 67.1 | 0.063 $\pm$ 0.007                | 2.4  | 21 $\pm$ 6                       | 31.4 |
| J1                               | 19 $\pm$ 0.2      | —                       | 25.5 | 1.5 $\pm$ 0.1                    | 3.0  | 46 $\pm$ 4                       | 26.4 |
| J3                               | 43 $\pm$ 0.4      | —                       | 60.3 | 0.53 $\pm$ 0.03                  | 9.0  | 42 $\pm$ 4                       | 54.1 |
| Cruise: F13OS/1 (May 2013)       |                   |                         |      |                                  |      |                                  |      |
| B3                               | 100 $\pm$ 0.6     | —                       | 71.0 | 0.15 $\pm$ 0.03                  | 18.4 | 4.7 $\pm$ 1.1                    | 10.0 |
| E1                               | 100 $\pm$ 0.6     | —                       | 67.3 | 0.026 $\pm$ 0.006                | 10.3 | 0.70 $\pm$ 0.24                  | 1.9  |
| E5                               | 5 $\pm$ 0.1       | —                       | 74.1 | 0.0011 $\pm$ 0.0004              | 0.4  | 1.2 $\pm$ 0.4                    | 3.6  |
| G0                               | 150 $\pm$ 0.8     | —                       | 67.9 | 0.17 $\pm$ 0.18                  | 8.4  | 3.4 $\pm$ 3.8                    | 9.2  |
| G4                               | 25 $\pm$ 0.3      | —                       | 65.1 | 0.040 $\pm$ 0.043                | 11.0 | 5.6 $\pm$ 6.3                    | 17.5 |
| I1                               | 110 $\pm$ 0.7     | —                       | 72.3 | 0.077 $\pm$ 0.005                | 7.5  | 2.5 $\pm$ 0.4                    | 4.2  |
| J1                               | 27 $\pm$ 0.3      | —                       | 53.0 | 0.046 $\pm$ 0.004                | 1.8  | 2.1 $\pm$ 0.2                    | 2.7  |
| J3                               | 25 $\pm$ 0.4      | —                       | 59.6 | 0.030 $\pm$ 0.010                | 6.7  | 4.0 $\pm$ 1.4                    | 8.5  |
| Cruise: F13OS/2 (Aug. 2013)      |                   |                         |      |                                  |      |                                  |      |
| B3                               | 120 $\pm$ 0.6     | —                       | 72.4 | 0.29 $\pm$ 0.02                  | 16.5 | 7.5 $\pm$ 1.3                    | 13.7 |
| E1                               | 89 $\pm$ 0.5      | —                       | 66.5 | 0.21 $\pm$ 0.01                  | 6.8  | 6.3 $\pm$ 1.7                    | 8.9  |
| E5                               | 4 $\pm$ 0.2       | —                       | 70.0 | 0.0063 $\pm$ 0.0005              | 0.7  | 7.9 $\pm$ 1.2                    | 17.2 |
| G0                               | 110 $\pm$ 0.7     | —                       | 70.0 | 0.23 $\pm$ 0.01                  | 7.4  | 6.6 $\pm$ 0.9                    | 9.8  |
| G4                               | 39 $\pm$ 0.4      | —                       | 66.4 | 0.082 $\pm$ 0.004                | 4.8  | 7.6 $\pm$ 2.1                    | 16.1 |
| I1                               | 200 $\pm$ 1.0     | —                       | 71.4 | 0.73 $\pm$ 0.01                  | 8.3  | 13 $\pm$ 2                       | 14.5 |
| J1                               | 19 $\pm$ 0.3      | —                       | 30.6 | 0.086 $\pm$ 0.007                | 2.1  | 3.2 $\pm$ 0.3                    | 4.4  |
| J3                               | 23 $\pm$ 0.4      | —                       | 61.9 | 0.049 $\pm$ 0.008                | 6.8  | 7.4 $\pm$ 1.3                    | 16.0 |

Table S5 (continued)

| Stn.                             | <sup>137</sup> Cs | <sup>133</sup> Cs | Al<br>(mg/g-dry) | <sup>137</sup> Cs from sediments |      | <sup>133</sup> Cs from sediments |      |
|----------------------------------|-------------------|-------------------|------------------|----------------------------------|------|----------------------------------|------|
|                                  | (Bq/kg-dry)       | (µg/g-dry)        |                  | (Bq/kg-dry)                      | (%)  | (ng/g-dry)                       | (%)  |
| Cruise: F13OS/3 (Nov. 2013)      |                   |                   |                  |                                  |      |                                  |      |
| B3                               | 74 ± 0.5          | —                 | 67.8             | 0.14 ± 0.01                      | 20.9 | 5.5 ± 0.9                        | 10.4 |
| E1                               | 42 ± 0.4          | —                 | 66.8             | 0.055 ± 0.003                    | 2.4  | 3.4 ± 1.0                        | 6.8  |
| E5                               | 5 ± 0.2           | —                 | 73.9             | 0.0086 ± 0.0009                  | 0.3  | 8.7 ± 1.5                        | 19.8 |
| G0                               | 79 ± 0.5          | —                 | 72.0             | 0.16 ± 0.01                      | 2.2  | 6.7 ± 1.0                        | 12.4 |
| G4                               | 20 ± 0.3          | —                 | 68.6             | 0.15 ± 0.00                      | 2.2  | 28 ± 8                           | 25.0 |
| I1                               | 150 ± 0.7         | —                 | 72.8             | —                                | —    | 5.4 ± 1.0                        | 6.0  |
| J1                               | 12 ± 0.2          | —                 | 51.5             | 0.035 ± 0.002                    | 4.5  | 3.5 ± 0.3                        | 4.9  |
| J3                               | 24 ± 0.3          | —                 | 60.9             | 0.11 ± 0.01                      | 9.7  | 16 ± 1                           | 20.2 |
| Cruise: F13OS/4 (Jan. 2014)      |                   |                   |                  |                                  |      |                                  |      |
| B3                               | 99 ± 0.6          | —                 | 62.8             | 4.8 ± 0.2                        | 23.7 | 133 ± 22                         | 51.1 |
| E1                               | 71 ± 0.5          | —                 | 65.0             | 0.39 ± 0.02                      | 5.8  | 14 ± 4                           | 18.5 |
| E5                               | 7 ± 0.2           | —                 | 64.5             | 0.23 ± 0.01                      | 0.7  | 139 ± 19                         | 65.2 |
| G0                               | 120 ± 0.6         | —                 | 61.7             | 0.63 ± 0.02                      | 5.1  | 15 ± 2                           | 20.2 |
| G4                               | 18 ± 0.3          | —                 | 64.6             | 0.24 ± 0.01                      | 3.6  | 46 ± 13                          | 30.3 |
| I1                               | 180 ± 0.7         | —                 | 64.0             | 1.1 ± 0.0                        | 12.5 | 20 ± 3                           | 18.0 |
| J1                               | 9 ± 0.2           | —                 | 52.7             | 0.057 ± 0.003                    | 0.7  | 7.9 ± 0.6                        | 11.3 |
| J3                               | 29 ± 0.3          | —                 | 60.2             | 1.2 ± 0.0                        | 2.9  | 136 ± 10                         | 52.5 |
| Cruise: F14OS/1 (May 2014)       |                   |                   |                  |                                  |      |                                  |      |
| B3                               | 62 ± 0.4          | 2.08 ± 0.03       | 52.0             | 0.10 ± 0.003                     | 4.7  | 3.6 ± 0.6                        | 6.8  |
| E1                               | 40 ± 0.4          | 2.15 ± 0.03       | 71.1             | 0.024 ± 0.001                    | 0.1  | 1.7 ± 0.5                        | 3.6  |
| E5                               | 5 ± 0.2           | 4.38 ± 0.02       | 61.3             | 0.0032 ± 0.0002                  | 0.1  | 2.4 ± 0.4                        | 7.1  |
| G0                               | 130 ± 0.7         | 1.59 ± 0.08       | 33.3             | 0.29 ± 0.36                      | 24.4 | 3.4 ± 4.2                        | 12.1 |
| G4                               | —                 | 2.62 ± 0.04       | 39.4             | —                                | —    | —                                | —    |
| I1                               | —                 | 2.07 ± 0.04       | 35.9             | —                                | —    | —                                | —    |
| J1                               | 8 ± 0.2           | 1.17 ± 0.02       | 48.5             | 0.022 ± 0.001                    | 0.7  | 3.1 ± 0.2                        | 5.2  |
| J3                               | —                 | 3.30 ± 0.08       | 60.3             | —                                | —    | —                                | —    |
| Cruise: F14OS/2 (Aug. 2014)      |                   |                   |                  |                                  |      |                                  |      |
| B3                               | 73 ± 0.5          | 2.02 ± 0.001      | 46.9             | 0.19 ± 0.01                      | 7.9  | 5.2 ± 0.9                        | 9.5  |
| E1                               | 140 ± 0.6         | 1.33 ± 0.10       | 35.8             | 0.35 ± 0.01                      | 60.9 | 3.6 ± 1.0                        | 8.7  |
| E5                               | 4 ± 0.1           | 2.60 ± 0.12       | 44.9             | —                                | —    | 2.6 ± 0.6                        | 6.6  |
| G0                               | 98 ± 0.6          | 1.69 ± 0.08       | 37.5             | 0.24 ± 0.01                      | 14.5 | 4.1 ± 0.6                        | 9.4  |
| G4                               | —                 | 1.88 ± 0.20       | 55.1             | —                                | —    | —                                | —    |
| I1                               | —                 | 1.93 ± 0.07       | 46.3             | —                                | —    | —                                | —    |
| J1                               | 16 ± 0.2          | 1.22 ± 0.02       | 55.9             | 0.016 ± 0.0003                   | 1.1  | 1.3 ± 0.1                        | 3.2  |
| J3                               | —                 | 2.71 ± 0.04       | 44.5             | —                                | —    | —                                | —    |
| Cruise: F14OS/3 (Nov. 2014)      |                   |                   |                  |                                  |      |                                  |      |
| B3                               | 61 ± 0.5          | 1.59 ± 0.01       | 29.5             | 0.51 ± 0.02                      | 13.0 | 11 ± 2                           | 25.4 |
| E1                               | 43 ± 0.4          | 1.95 ± 0.03       | 35.2             | 0.14 ± 0.03                      | 4.5  | 4.5 ± 1.5                        | 12.5 |
| E5                               | 6 ± 0.2           | 3.12 ± 0.08       | 44.9             | 0.029 ± 0.003                    | 0.8  | 13 ± 2                           | 36.1 |
| G0                               | 96 ± 0.6          | 1.91 ± 0.05       | 37.0             | 0.18 ± 0.03                      | 6.5  | 3.2 ± 0.6                        | 11.0 |
| G4                               | —                 | 2.93 ± 0.06       | 45.3             | —                                | —    | —                                | —    |
| I1                               | —                 | 1.96 ± 0.02       | 36.3             | —                                | —    | —                                | —    |
| J1                               | 7 ± 0.2           | 1.30 ± 0.04       | 59.8             | 0.015 ± 0.001                    | 0.7  | 3.1 ± 0.2                        | 11.8 |
| J3                               | —                 | 2.90 ± 0.08       | 53.2             | —                                | —    | —                                | —    |
| Cruise: F14OS/4 (Jan.-Feb. 2015) |                   |                   |                  |                                  |      |                                  |      |
| B3                               | 53 ± 0.4          | 1.86 ± 0.08       | 48.4             | 2.46 ± 0.43                      | 94.2 | 98 ± 23                          | 66.9 |
| E1                               | 56 ± 0.4          | 1.64 ± 0.04       | 45.1             | 2.05 ± 0.19                      | 60.6 | 66 ± 19                          | 63.3 |
| E5                               | 4 ± 0.1           | 3.26 ± 0.07       | 60.8             | 0.013 ± 0.002                    | 0.6  | 12 ± 2                           | 43.5 |
| G0                               | 96 ± 0.6          | 2.11 ± 0.06       | 57.0             | 0.62 ± 0.03                      | 8.4  | 17 ± 2                           | 24.7 |
| G4                               | —                 | 3.12 ± 0.08       | 60.4             | —                                | —    | —                                | —    |
| I1                               | —                 | 2.11 ± 0.07       | 48.7             | —                                | —    | —                                | —    |
| J1                               | 8 ± 0.2           | 1.27 ± 0.14       | 51.4             | 0.21 ± 0.01                      | 1.5  | 33 ± 3                           | 23.1 |
| J3                               | —                 | 2.89 ± 0.11       | 56.0             | —                                | —    | —                                | —    |

Table S6. Dry weight and total radioactivity of  $^{137}\text{Cs}$  in zooplankton samples.

| Stn.                             | Dry weight<br>(g-dry) | Total radioactivity of $^{137}\text{Cs}$<br>(Bq/sample) |
|----------------------------------|-----------------------|---------------------------------------------------------|
| Cruise: F12OS/1 (May 2012)       |                       |                                                         |
| B3                               | 19.9                  | 0.06                                                    |
| E1                               | 116.0                 | 0.20                                                    |
| E5                               | 90.1                  | 0.16                                                    |
| G0                               | 51.7                  | 1.11                                                    |
| G4                               | 105.7                 | 0.63                                                    |
| J1                               | 6.3                   | 1.17                                                    |
| J3                               | 48.6                  | 1.03                                                    |
| Cruise: F12OS/2 (Aug. 2012)      |                       |                                                         |
| B3                               | 181.1                 | 0.22                                                    |
| E1                               | 63.6                  | —                                                       |
| E5                               | 10.9                  | —                                                       |
| G0                               | 94.7                  | 0.31                                                    |
| G4                               | 96.9                  | 1.58                                                    |
| J1                               | 71.0                  | 0.68                                                    |
| J3                               | 44.1                  | 0.13                                                    |
| Cruise: F12OS/3 (Oct.-Nov. 2012) |                       |                                                         |
| B3                               | 116.3                 | 0.17                                                    |
| E1                               | 87.0                  | 0.54                                                    |
| E5                               | 124.8                 | —                                                       |
| G0                               | 79.9                  | 1.04                                                    |
| G4                               | 128.2                 | 0.63                                                    |
| J1                               | 181.4                 | 2.65                                                    |
| Cruise: F12OS/4 (Jan. 2013)      |                       |                                                         |
| B3                               | 40.8                  | 1.23                                                    |
| E1                               | 49.5                  | 2.87                                                    |
| E5                               | 15.9                  | 0.05                                                    |
| G0                               | 24.0                  | 0.21                                                    |
| G4                               | 21.3                  | 0.05                                                    |
| J1                               | 58.9                  | 2.98                                                    |
| J3                               | 27.8                  | 0.16                                                    |
| Cruise: F13OS/1 (May 2013)       |                       |                                                         |
| B3                               | 67.0                  | 0.05                                                    |
| E1                               | 172.3                 | 0.04                                                    |
| E5                               | 292.8                 | 0.08                                                    |
| G0                               | 141.4                 | 0.28                                                    |
| G4                               | 171.9                 | 0.06                                                    |
| I1                               | 217.9                 | 0.22                                                    |
| J1                               | 112.5                 | 0.29                                                    |
| J3                               | 209.2                 | 0.09                                                    |
| Cruise: F13OS/2 (Aug. 2013)      |                       |                                                         |
| B3                               | 80.0                  | 0.14                                                    |
| E1                               | 55.8                  | 0.17                                                    |
| E5                               | 68.5                  | 0.07                                                    |
| G0                               | 50.5                  | 0.16                                                    |
| G4                               | 51.0                  | 0.09                                                    |
| I1                               | 71.9                  | 0.63                                                    |
| J1                               | 359.9                 | 1.48                                                    |
| J3                               | 101.4                 | 0.07                                                    |

Table S6 (continued)

| Stn.                             | Dry weight<br>(g-dry) | Total radioactivity of $^{137}\text{Cs}$<br>(Bq/sample) |
|----------------------------------|-----------------------|---------------------------------------------------------|
| Cruise: F13OS/3 (Nov. 2013)      |                       |                                                         |
| B3                               | 23.3                  | 0.02                                                    |
| E1                               | 133.4                 | 0.30                                                    |
| E5                               | 48.5                  | 0.12                                                    |
| G0                               | 82.3                  | 0.60                                                    |
| G4                               | 38.4                  | 0.27                                                    |
| I1                               | 50.1                  | —                                                       |
| J1                               | 127.1                 | 0.10                                                    |
| J3                               | 67.8                  | 0.08                                                    |
| Cruise: F13OS/4 (Jan. 2014)      |                       |                                                         |
| B3                               | 31.5                  | 0.64                                                    |
| E1                               | 11.8                  | 0.08                                                    |
| E5                               | 3.4                   | 0.11                                                    |
| G0                               | 19.9                  | 0.25                                                    |
| G4                               | 8.3                   | 0.05                                                    |
| I1                               | 12.5                  | 0.11                                                    |
| J1                               | 21.8                  | 0.19                                                    |
| J3                               | 5.9                   | 0.24                                                    |
| Cruise: F14OS/1 (May 2014)       |                       |                                                         |
| B3                               | 260.7                 | 0.54                                                    |
| E1                               | 242.6                 | 4.83                                                    |
| E5                               | 256.7                 | 0.76                                                    |
| G0                               | 172.8                 | 0.21                                                    |
| J1                               | 272.1                 | 0.92                                                    |
| Cruise: F14OS/2 (Aug. 2014)      |                       |                                                         |
| B3                               | 104.4                 | 0.25                                                    |
| E1                               | 87.0                  | 0.05                                                    |
| E5                               | 84.5                  | —                                                       |
| G0                               | 99.4                  | 0.16                                                    |
| J1                               | 232.0                 | 0.36                                                    |
| Cruise: F14OS/3 (Nov. 2014)      |                       |                                                         |
| B3                               | 48.5                  | 0.19                                                    |
| E1                               | 109.3                 | 0.33                                                    |
| E5                               | 83.4                  | 0.30                                                    |
| G0                               | 94.2                  | 0.26                                                    |
| J1                               | 71.7                  | 0.16                                                    |
| Cruise: F14OS/4 (Jan.-Feb. 2015) |                       |                                                         |
| B3                               | 28.4                  | 0.07                                                    |
| E1                               | 20.5                  | 0.07                                                    |
| E5                               | 12.3                  | 0.03                                                    |
| G0                               | 6.6                   | 0.05                                                    |
| J1                               | 1.2                   | 0.02                                                    |
